# Supplementary material
Source: Springer Nature journal article supplement (https://www.springermedizin.de/resource/supplementary/12936_2011_1863_MOESM4_ESM.pdf/9541942)

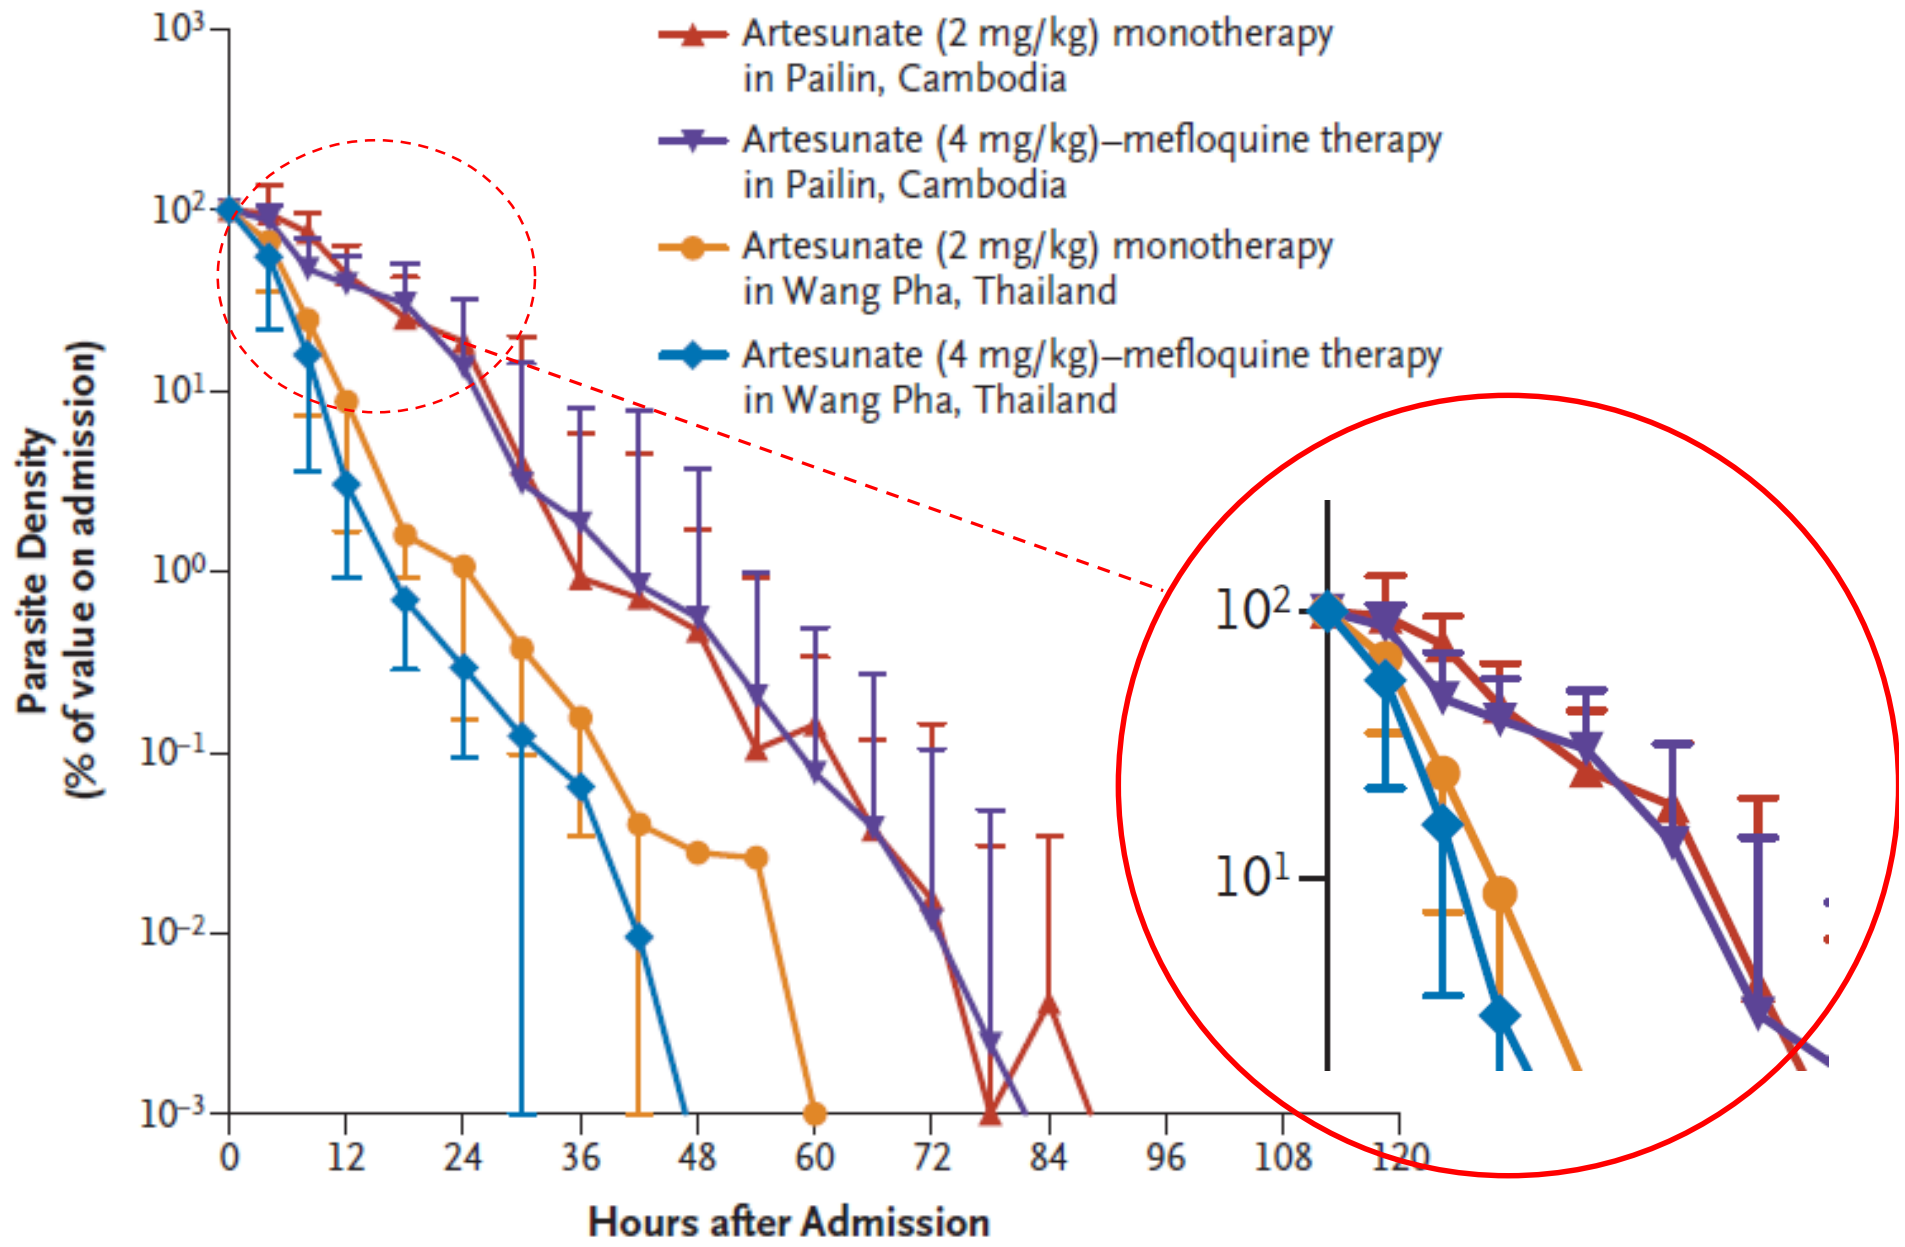

Supplement: MOESM4 [file 9541942]
